# Supplementary material for: Simple growth of BCNO@C core shell fibres and luminescent BCNO tubes
Source: Royal Society of Chemistry journal article supplement (doi:10.1039/c4ce02266a), 2015-01-01
Supplement: c4ce02266a1.pdf [file c4ce02266a1.pdf]

# Supporting Information for

## Simple Growth of BCNO@C Core Shell Fibers and Luminescent BCNO Tubes

Liangxu Lin<sup>a</sup>, Le Ma<sup>a,†</sup>, Shaowei Zhang<sup>\*b</sup>, Juntong Huang<sup>b</sup> and Dan A. Allwood<sup>\*a</sup>

<sup>a</sup> Department of Materials Science and Engineering, University of Sheffield, Sheffield S1 3JD, UK

<sup>b</sup> College of Engineering, Mathematics and Physical Sciences, University of Exeter, Exeter EX4 5QF, UK

Corresponding Author

\*(D. A. Allwood), Email: [d.allwood@sheffield.ac.uk](mailto:d.allwood@sheffield.ac.uk).

\*(S. Zhang) Email: [s.zhang@exeter.ac.uk](mailto:s.zhang@exeter.ac.uk).

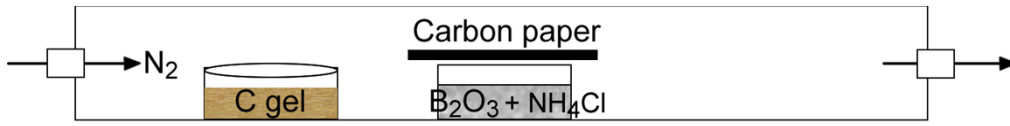

**Scheme S1.** Scheme of the preparation of BCNO@C fibers.

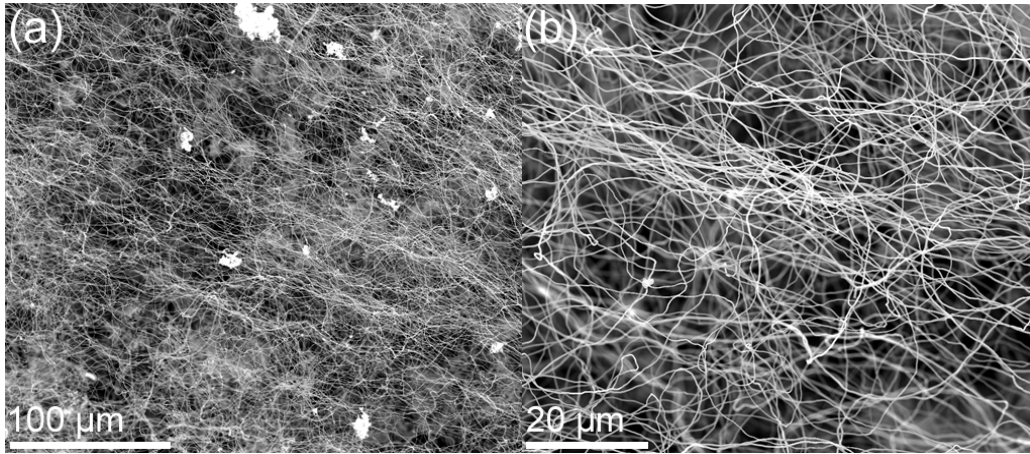

**Figure S1.** SEM images of the BCNO@C fibers.

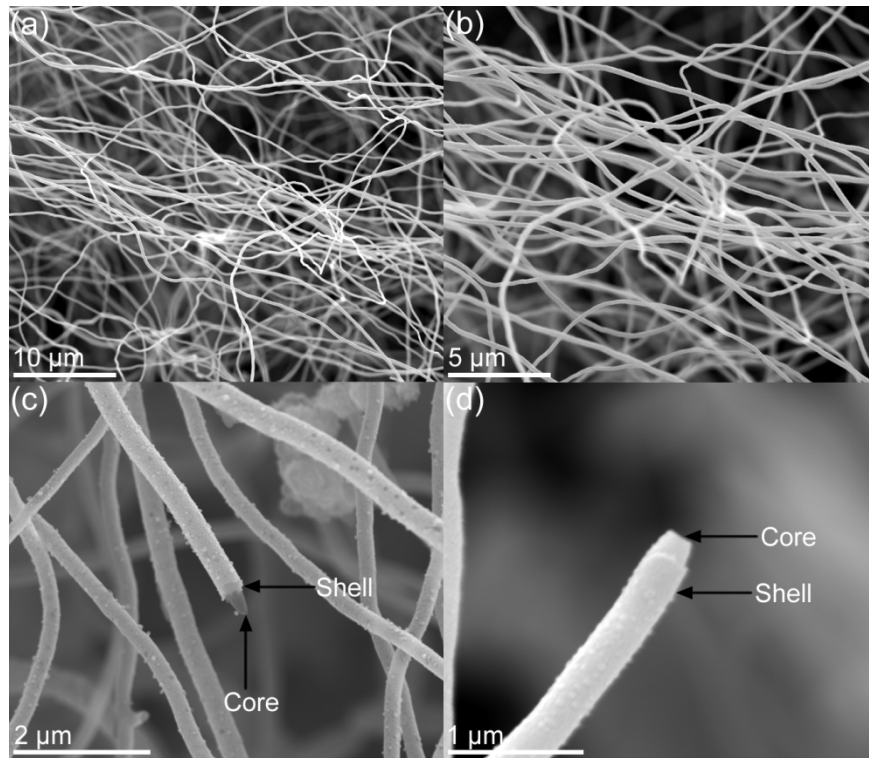

**Figure S2.** SEM images of the BCNO@C fibers on Si substrate, showing the core shell structure.

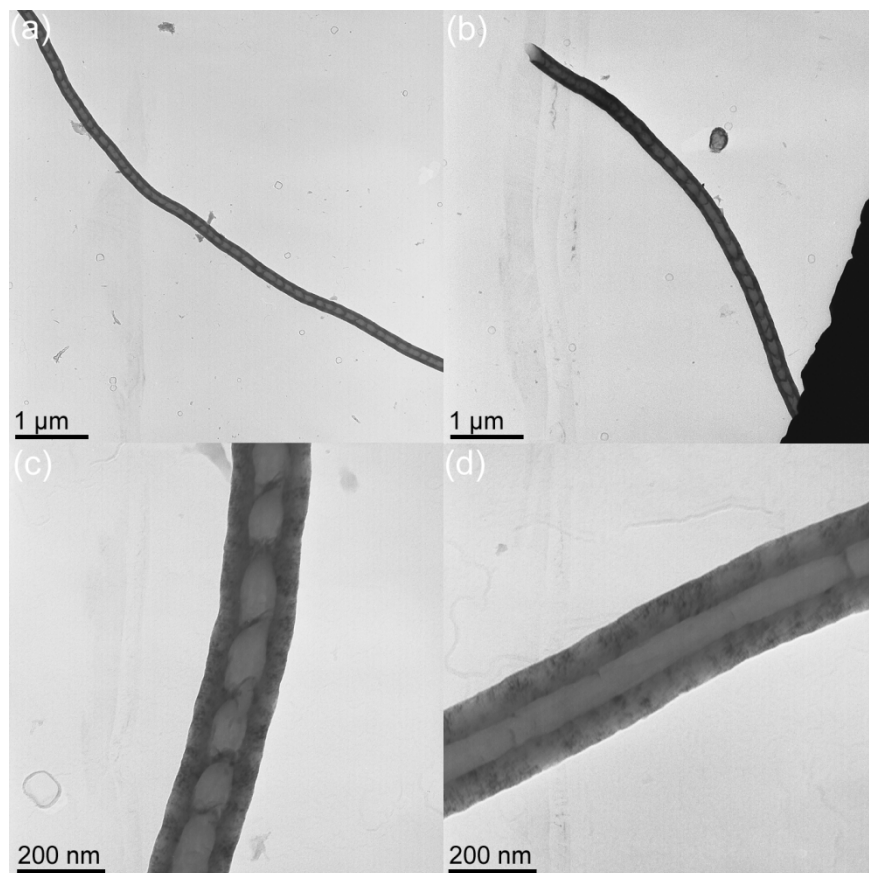

**Figure S3.** TEM images of the BCNO@C fibers.

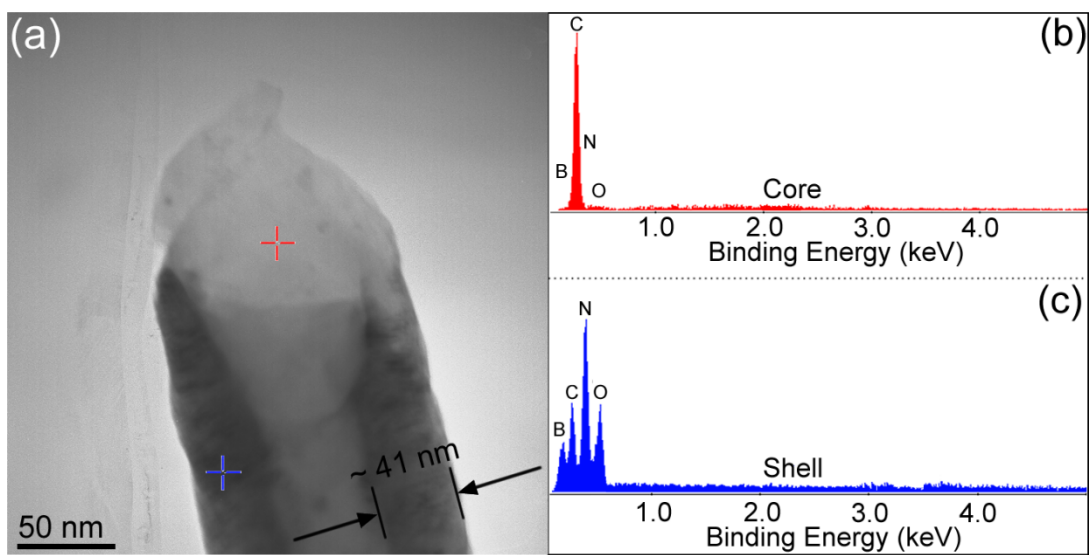

**Figure S4.** TEM (a) and EDS (b-c) of the BCNO@C fiber. The EDS was taken from different areas of the fibers, as indicated by the label in these images.

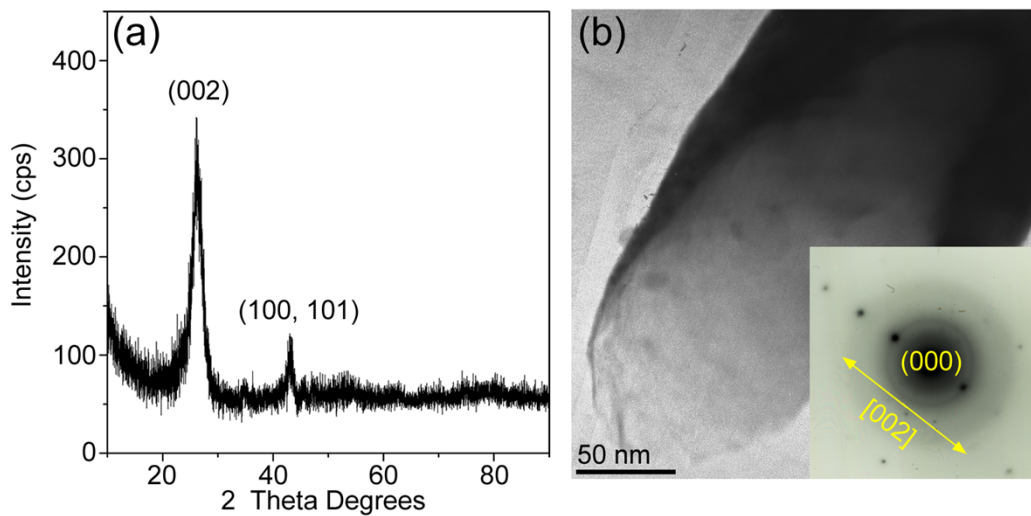

**Figure S5.** XRD (a), TEM (b) and relating SAED pattern (image b inset, diffraction pattern of the fiber tip) suggest the crystallinity of the BCNO@C fibers. Crystal structure was assigned with the layered structure BN and graphite (JCPDS: 45-0896 and 41-1487). Substitution of the BN with C or O (or substitution of graphite with B, O) should give similar layered structure.

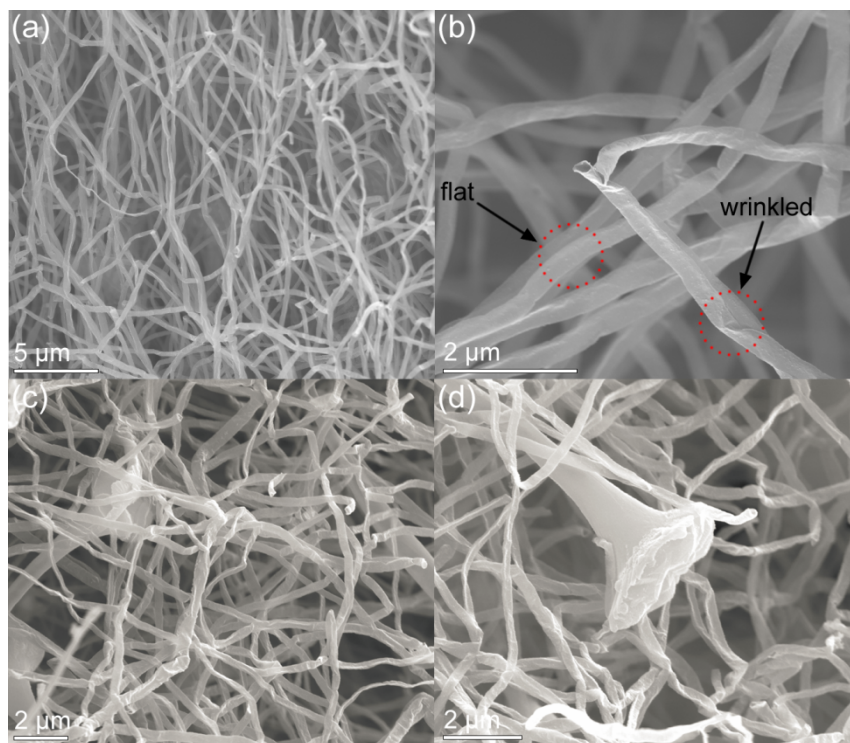

**Figure S6.** SEM images of BCNO tubes on Si substrate.

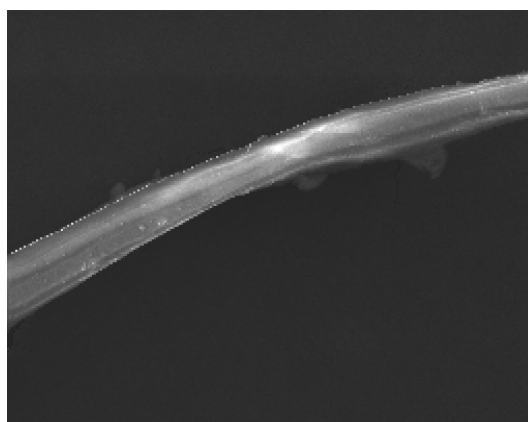

**Figure S7.** SEM image of one BCNO tube on Si substrate.

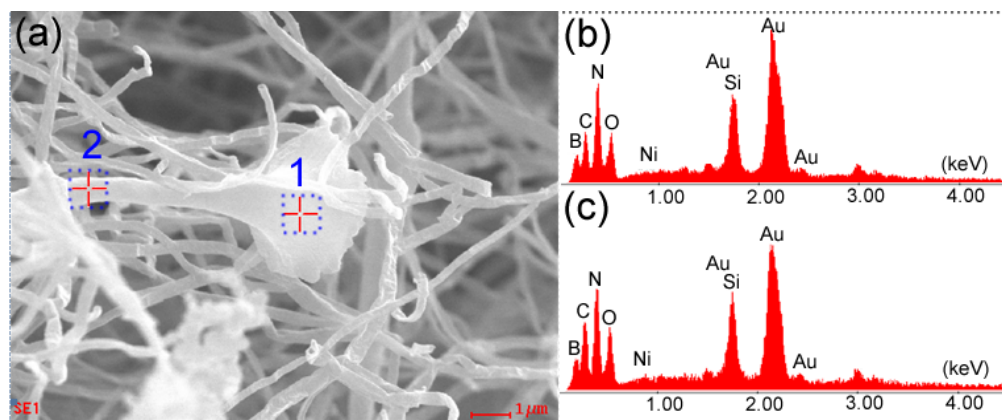

**Figure S8.** EDS analyses of the BCNO tubes, which show the similar compositions of the tip and tube body. Images b and c correspond the EDS taken from beam positions 1 and 2 in image a, respectively. The results are also similar with the EDS taken under TEM analysis (see Figure S4c). The Si element arose from the substrate.

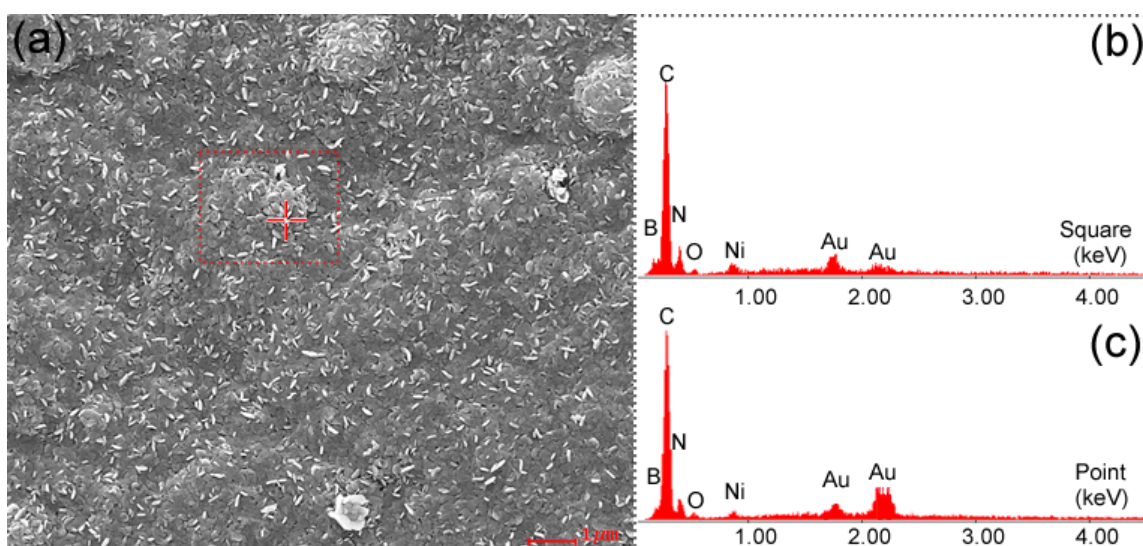

**Figure S9.** SEM image (a) and EDS analyses of carbon seeds (b) (collected from the square in image a) and (c) (collected from a carbon seed). Only weak Ni signal was detected and the seeds were mainly composed by C.

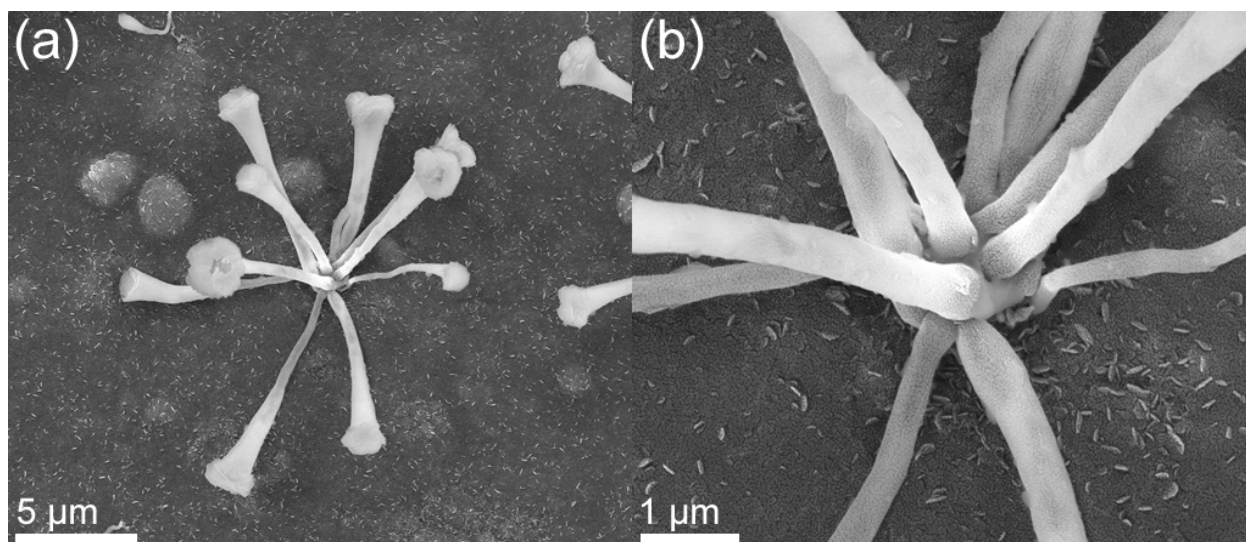

**Figure S10.** SEM image of one root with different magnifications which was mixed with carbon source.
